# Supplementary material
Source: Springer Nature journal article supplement (https://repositorio.tec.mx/bitstream/handle/11285/613677/12952_2006_45_MOESM2_ESM.pdf)

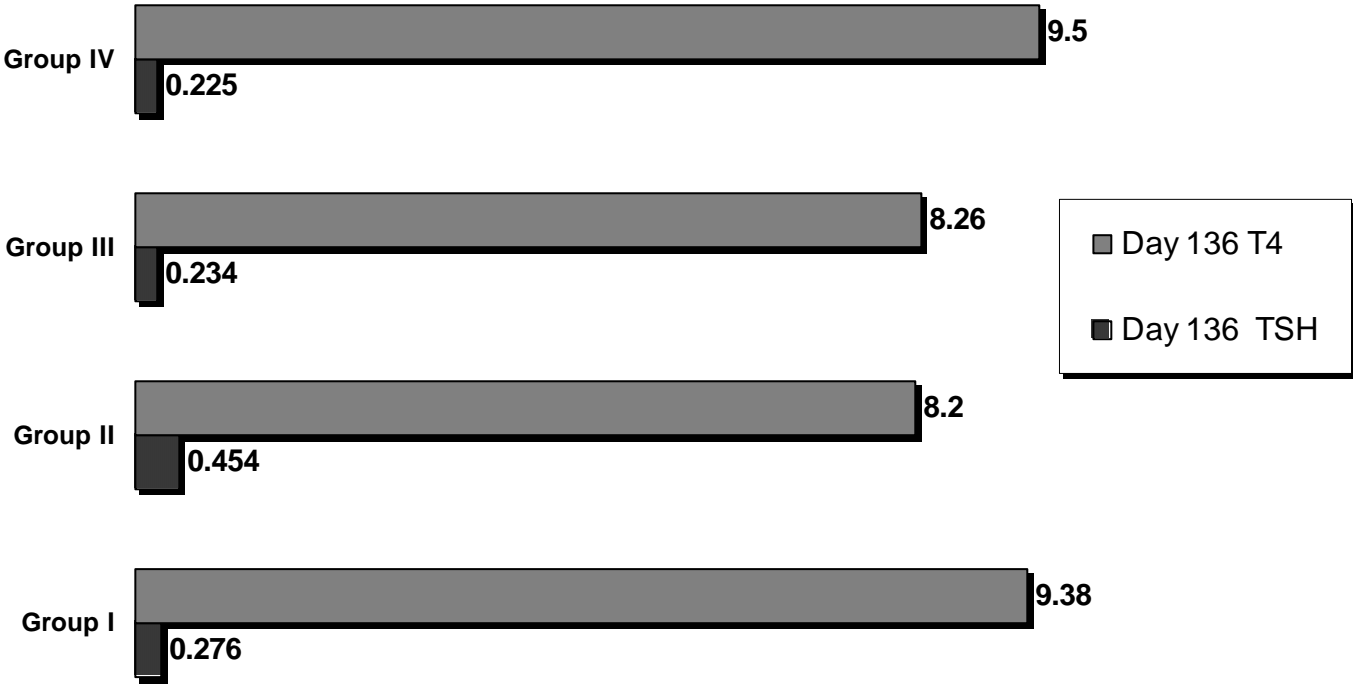

Supplement: MOESM2 [file 12952_2006_45_MOESM2_ESM.pdf]
